# Supplementary material
Source: MDPI journal article supplement (https://www.mdpi.com/2072-4292/14/3/444)
Supplement: s1 [file s1]

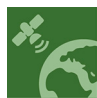

Supplementation information

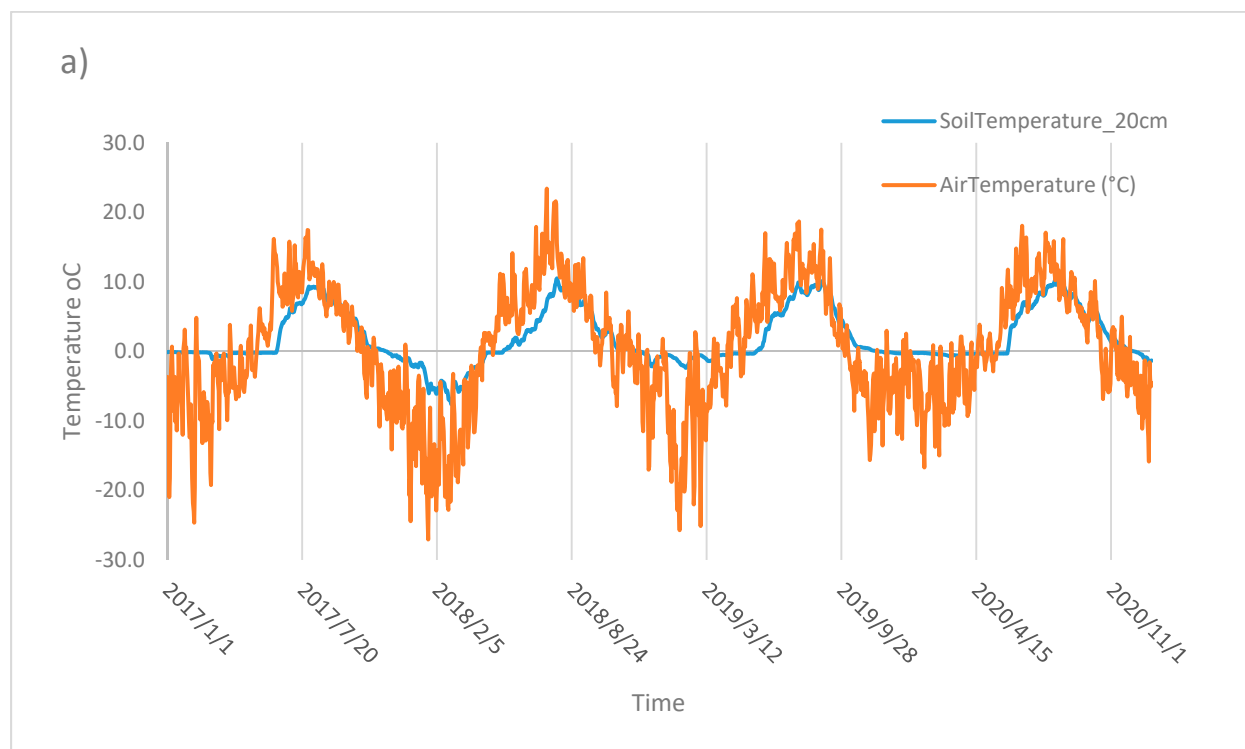

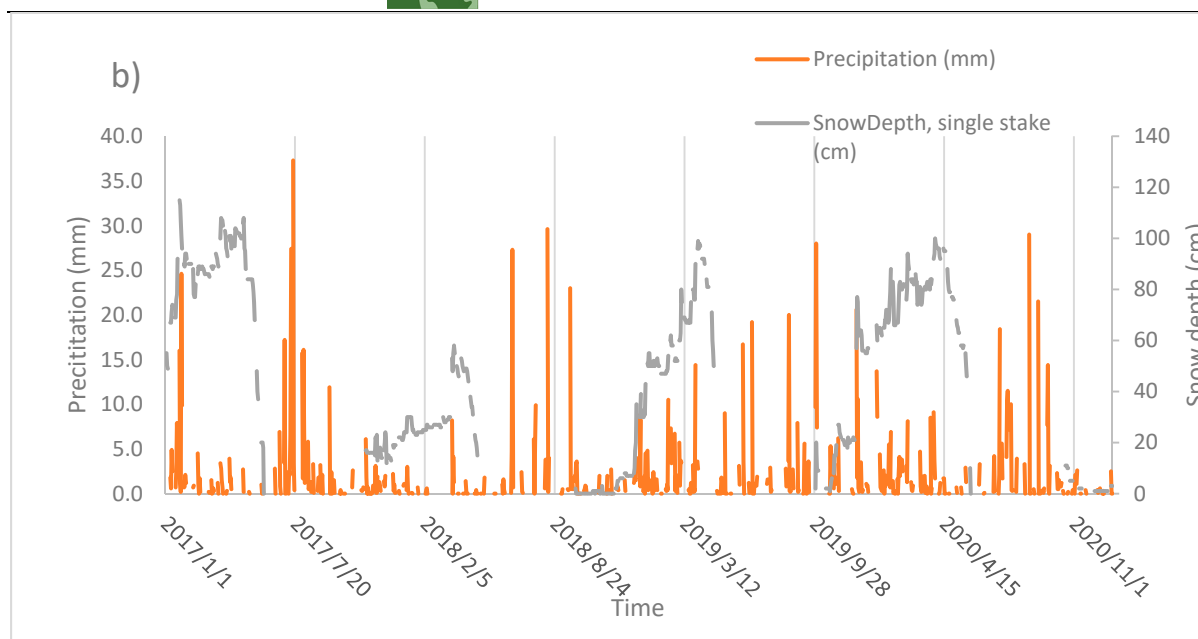

**Figure S1.** Air and soil temperature a) and precipitation and snow depth b) data from Abisko Research Station (located within 5 km of the study site) for the study period.

**Table S1:** confusion matrix of supervised vegetation classification for Tourist St..

| n = 77    |               | validation    |              |              |         |                     |                |              |                |                  | User accuracy |               |
|-----------|---------------|---------------|--------------|--------------|---------|---------------------|----------------|--------------|----------------|------------------|---------------|---------------|
| predicted |               | Anthropogenic | Water bodies | Rock outcrop | Shadows | Sparse birch forest | Forest wetland | Raised palsa | Willow wetland | Sphagnum wetland |               | Sedge wetland |
|           | Anthropogenic | NA            | NA           | NA           | NA      | NA                  | NA             | NA           | NA             | NA               |               | NA            |
|           | Water bodies  | NA            | 3            | NA           | NA      | 0                   | 0              | 0            | 0              | 0                |               | 0             |

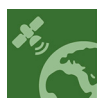

|                     |    |       |    |    |       |       |      |      |      |      |       |
|---------------------|----|-------|----|----|-------|-------|------|------|------|------|-------|
| Rock outcrop        | NA | NA    | NA | NA | NA    | NA    | NA   | NA   | NA   | NA   | NA    |
| Shadows             | NA | NA    | NA | NA | NA    | NA    | NA   | NA   | NA   | NA   | NA    |
| Sparse birch forest | NA | 0     | NA | NA | 1     | 0     | 0    | 0    | 0    | 0    | 100.0 |
| Forested wetland    | NA | 0     | NA | NA | 0     | 1     | 1    | 3    | 0    | 0    | 20.0  |
| Raised palsa        | NA | 0     | NA | NA | 0     | 0     | 33   | 0    | 0    | 0    | 100.0 |
| Willow wetland      | NA | 0     | NA | NA | 0     | 0     | 2    | 5    | 0    | 0    | 71.4  |
| Sphagnum wetland    | NA | 0     | NA | NA | 0     | 0     | 5    | 0    | 11   | 1    | 64.7  |
| Sedge wetland       | NA | 0     | NA | NA | 0     | 0     | 1    | 0    | 1    | 9    | 81.8  |
| Producer accuracy   | NA | 100.0 | NA | NA | 100.0 | 100.0 | 78.6 | 62.5 | 91.7 | 90.0 | 81.82 |

**Table S2:** Confusion matrix of supervised vegetation classification for Storflaket.

| n = 114   |               | validation   |              |         |                     |                  |              |                |                  |               | User accuracy |
|-----------|---------------|--------------|--------------|---------|---------------------|------------------|--------------|----------------|------------------|---------------|---------------|
| predicted | Anthropogenic | Water bodies | Rock outcrop | Shadows | Sparse birch forest | Forested wetland | Raised palsa | Willow wetland | Sphagnum wetland | Sedge wetland |               |
|           | Anthropogenic | 2            | 0            | 1       | NA                  | NA               | 0            | 0              | 0                | 0             | 66.7          |
|           | Water bodies  | 0            | 7            | 0       | NA                  | NA               | 0            | 1              | 1                | 1             | 58.3          |
|           | Rock outcrop  | NA           | NA           | NA      | NA                  | NA               | NA           | NA             | NA               | NA            | NA            |



|                     |       |       |    |    |    |       |      |      |      |      |       |
|---------------------|-------|-------|----|----|----|-------|------|------|------|------|-------|
| Shadows             | 0     | 0     | 0  | NA | NA | 0     | 0    | 1    | 1    | 0    | NA    |
| Sparse birch forest | NA    | NA    | NA | NA | NA | NA    | NA   | NA   | NA   | NA   | NA    |
| Forested wetland    | 0     | 0     | 0  | NA | NA | 2     | 0    | 0    | 1    | 1    | 50.0  |
| Raised palsa        | 0     | 0     | 0  | NA | NA | 0     | 60   | 1    | 1    | 6    | 88.2  |
| Willow wetland      | 0     | 0     | 0  | NA | NA | 0     | 3    | 4    | 0    | 1    | 50.0  |
| Sphagnum wetland    | 0     | 0     | 0  | NA | NA | 0     | 1    | 0    | 6    | 2    | 66.7  |
| Sedge wetland       | 0     | 0     | 0  | NA | NA | 0     | 2    | 0    | 3    | 3    | 37.5  |
| Producer accuracy   | 100.0 | 100.0 | NA | NA | NA | 100.0 | 89.6 | 57.1 | 46.2 | 20.0 | 73.68 |

Table S3: Confusion matrix of supervised vegetation classification for Stordalen

| n = 197       |  | validation    |              |              |         |                     |                  |              |                |                  |               | User accuracy |
|---------------|--|---------------|--------------|--------------|---------|---------------------|------------------|--------------|----------------|------------------|---------------|---------------|
| predicted     |  | Anthropogenic | Water bodies | Rock outcrop | Shadows | Sparse birch forest | Forested wetland | Raised palsa | Willow wetland | Sphagnum wetland | Sedge wetland |               |
|               |  |               |              |              |         |                     |                  |              |                |                  |               |               |
| Anthropogenic |  | 4             | 0            | 0            | NA      | 0                   | 0                | 0            | 0              | 1                | 0             | 80.0          |
| Water bodies  |  | 0             | 5            | 0            | NA      | 0                   | 0                | 1            | 0              | 9                | 0             | 33.3          |
| Rock outcrop  |  | 1             | 0            | 2            | NA      | 0                   | 0                | 0            | 0              | 0                | 0             | 66.7          |
| Shadows       |  | 0             | 0            | 0            | NA      | 0                   | 0                | 0            | 0              | 0                | 0             | NA            |
| Sparse birch  |  | 0             | 0            | 0            | NA      | 1                   | 0                | 0            | 0              | 1                | 0             | 50.0          |

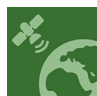

|                   |      |       |       |    |       |      |      |      |      |      |       |
|-------------------|------|-------|-------|----|-------|------|------|------|------|------|-------|
| forest            |      |       |       |    |       |      |      |      |      |      |       |
| Forested wetland  | 0    | 0     | 0     | NA | 0     | 8    | 2    | 3    | 0    | 2    | 53.3  |
| Raised palsa      | 0    | 0     | 0     | NA | 0     | 0    | 56   | 0    | 7    | 1    | 87.5  |
| Willow wetland    | 0    | 0     | 0     | NA | 0     | 2    | 6    | 11   | 0    | 4    | 47.8  |
| Sphagnum wetland  | 0    | 0     | 0     | NA | 0     | 0    | 7    | 0    | 36   | 0    | 83.7  |
| Sedge wetland     | 0    | 0     | 0     | NA | 0     | 0    | 7    | 4    | 2    | 14   | 51.9  |
| Producer accuracy | 80.0 | 100.0 | 100.0 | NA | 100.0 | 80.0 | 70.9 | 61.1 | 64.3 | 66.7 | 69.54 |

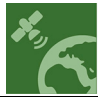

**Table S4:** Surface level range and SE during snow-free period and standard error of surface level range during snow-free period of 2017 and 2020 for the Tourist St., Storflaket and Stordalen sites. \*Anthropogenic statistics have been calculated for areas outside of the wetland to inform surface stability.

|                  | Tourist station (cm) |         | Storflaket (cm) |         | Stordalen (cm) |          |
|------------------|----------------------|---------|-----------------|---------|----------------|----------|
| 2017             |                      |         |                 |         |                |          |
| Anthropogenic*   | 0.81                 | (0.025) | 0.81            | (0.018) |                |          |
| Raised palsa     | 0.79                 | (0.032) | 0.97            | (0.012) | 0.95           | (0.0109) |
| Sphagnum wetland | 0.87                 | (0.043) | 0.91            | (0.049) | 0.95           | (0.0166) |
| Sedge wetland    | 0.8                  | (0.046) | 0.97            | (0.016) | 0.87           | (0.0141) |
| Willow wetland   |                      |         | 0.85            | (0.034) | 0.91           | (0.013)  |
| Forested wetland | 0.89                 | (0.019) | 0.95            | (0.029) | 0.92           | (0.013)  |
| 2020             |                      |         |                 |         |                |          |
| Anthropogenic*   | 0.77                 | (0.022) | 0.80            | (0.016) |                |          |
| Raised palsa     | 0.85                 | (0.032) | 0.87            | (0.011) | 1.1            | (0.016)  |
| Sphagnum wetland | 0.78                 | (0.033) | 0.84            | (0.060) | 1.2            | (0.021)  |
| Sedge wetland    | 0.79                 | (0.035) | 0.90            | (0.015) | 1.2            | (0.024)  |
| Willow wetland   |                      |         | 0.86            | (0.036) | 1.2            | (0.023)  |
| Forested         | 0.81                 | (0.021) | 0.88            | (0.027) | 1.1            | (0.020)  |
